# Supplementary material
Source: MDPI journal article supplement (https://www.mdpi.com/2227-9040/11/5/296)
Supplement: s1 [file s1]

*Supplementary Material*

# **Engineering Band Structure of SnO<sub>2</sub> Nanoparticles via Coupling with g-C<sub>3</sub>N<sub>4</sub> Nanosheet for the Detection of Ethanolamine**

Jiuyu Li <sup>1</sup>, Kerui Xie <sup>1</sup>, Yating Wang <sup>1</sup>, Ruihua Zhao <sup>1</sup>, Yangyang Shang <sup>1</sup> and Jianping Du <sup>1,2,3,\*</sup>

<sup>1</sup> College of Chemical and Engineering Technology, Taiyuan University of Technology, 79 Yingze West Street, Taiyuan 030024, China

<sup>2</sup> College of Chemistry, Taiyuan University of Technology, 79 Yingze West Street, Taiyuan 030024, China

<sup>3</sup> Key Laboratory of Gas Energy Efficient and Clean Utilization, Taiyuan University of Technology, Taiyuan 030024, China

\* Correspondence: dujp518@163.com

## Computational Details

The band structure and density of states of the heterojunction formed by SnO<sub>2</sub> and g-C<sub>3</sub>N<sub>4</sub> were analyzed theoretically. The Vienna Abinitio Simulation Package (VASP) and the super soft pseudopotential of the projection enhanced wave (PAW) are used to carry out density functional theory (DFT) calculation, and Perdew-Burke-Ernzerhof (PBE) is used as generalized gradient approximation (GGA) for commutative associated potential energy.[33] Other information can be referred to details (Supporting Information).

The Monkhorst Pack k-mesh of 4×4×4 for g-C<sub>3</sub>N<sub>4</sub> (001) surfaces and 12×12×5 for SnO<sub>2</sub> (001) surfaces was used. The cut-off energy of the plane wave base is set to 400eV, and the total energy converges to 10<sup>-5</sup> eV. When the residual force is less than 0.01 eV Å<sup>-1</sup>, all atoms relax completely. The effective energy band structure and density of states (DOS) of g-C<sub>3</sub>N<sub>4</sub>, SnO<sub>2</sub> and g-C<sub>3</sub>N<sub>4</sub>/SnO<sub>2</sub> materials were obtain by processing the energy band calculation results based on the VASPKIT code.[34]

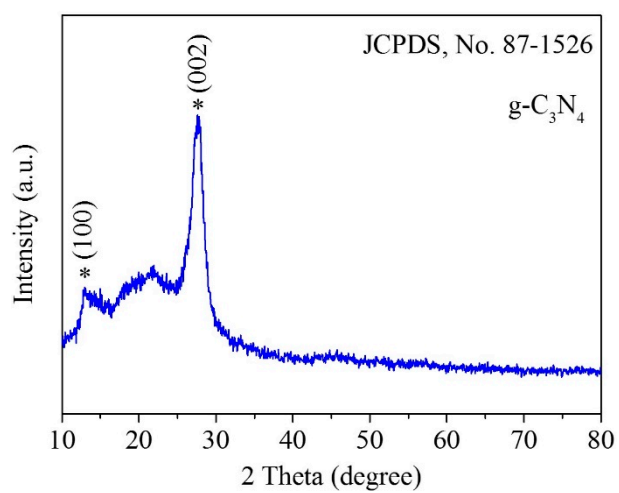

Figure S1 XRD patterns of g-C<sub>3</sub>N<sub>4</sub>

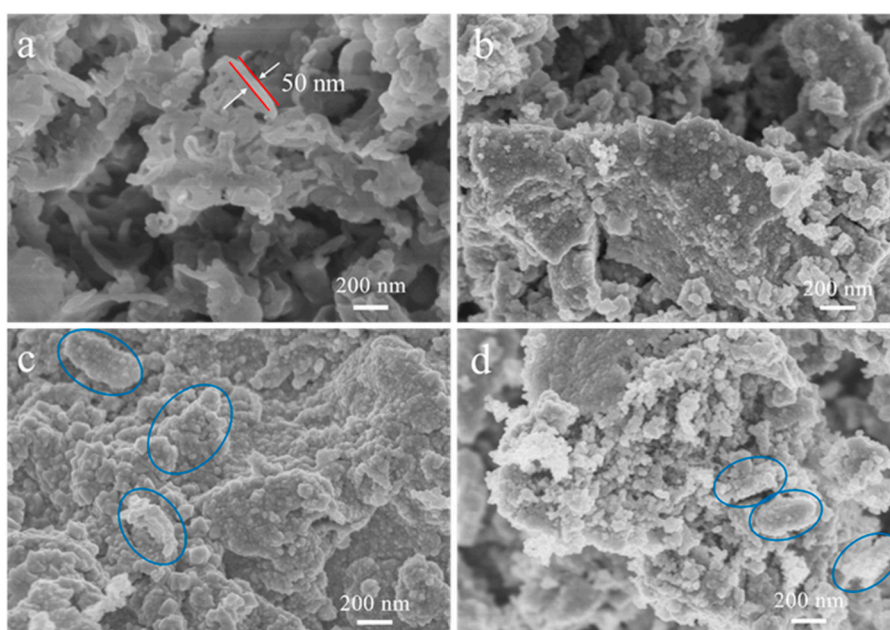

Figure S2 SEM images of as-synthesized materials (a) g-C<sub>3</sub>N<sub>4</sub>, (b) SnO<sub>2</sub>, (c) g-C<sub>3</sub>N<sub>4</sub>/SnO<sub>2</sub>-2.5 and (d) g-C<sub>3</sub>N<sub>4</sub>/SnO<sub>2</sub>-10

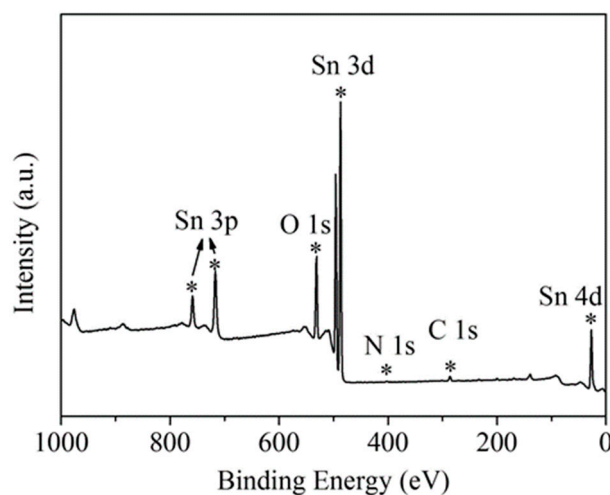

Figure S3 XPS spectra of the full range spectrum of g-C<sub>3</sub>N<sub>4</sub>/SnO<sub>2</sub>-5 material

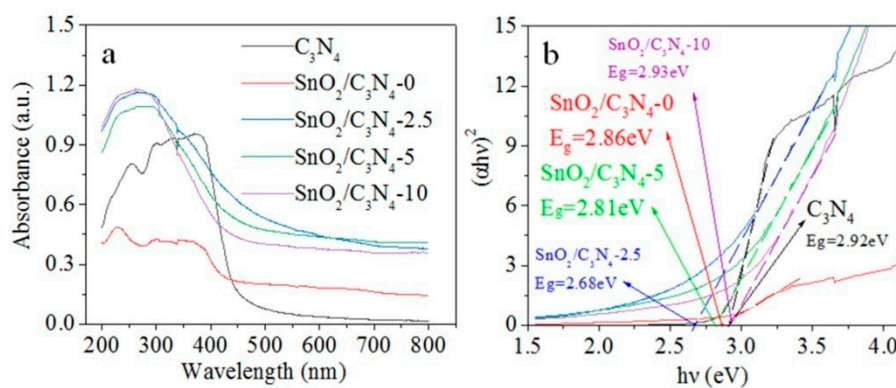

Figure S4 (a) UV-Vis absorption spectra of g-C<sub>3</sub>N<sub>4</sub>, SnO<sub>2</sub> and g-C<sub>3</sub>N<sub>4</sub>/SnO<sub>2</sub> and (b) bandgap energy of g-C<sub>3</sub>N<sub>4</sub>, SnO<sub>2</sub> and g-C<sub>3</sub>N<sub>4</sub>/SnO<sub>2</sub>

## References

- [33] Liangruksa, M.; Sukpoonprom, P.; Junkaew, A.; Photaram, W.; Siri Wong, C. Gas sensing properties of palladium-modified zinc oxide nanofilms: A DFT study, *Appl. Surf. Sci.* 2021,544,148868. <https://doi.org/10.1016/j.apsusc.2020.148868>.
- [34] Wang, V.; Xu, N.; Liu, J. C. VASPKIT: A user-friendly interface facilitating high-throughput computing and analysis using VASP code, *Computer Phys. Commun.*, 2021,267,108033.
